# Supplementary material for: Assessment of diesel particulate matter exposure in the workplace: freight terminals
Source: Royal Society of Chemistry journal article supplement (doi:10.1039/b715429a), 2008-01-01
Supplement: b715429a.pdf [file b715429a.pdf]

Supplementary Material (ESI) for Journal of Environmental Monitoring  
This journal is © The Royal Society of Chemistry 2008

Supplemental Materials

Assessment of diesel particulate matter exposure in the workplace: freight  
terminals

Rebecca J. Sheesley, James J. Schauer, Tom Smith, Eric Garshick, Francine Laden, Linsey Marr,  
Luisa Molina

**Repair shop source**

All motor vehicle tracers are weighted average of all shops, all other tracers are the average of shops 14 and 15 (non-smoke impacted). OC has been adjusted by site for CMB wood smoke, cigarette smoke and natural gas contributions.

**Table S1.**

| ug/ug OC                | Shop profile |                                    |
|-------------------------|--------------|------------------------------------|
| Elemental carbon        | 0.386979     | weight average by OC concentration |
| uncertainty             | 0.019349     | SHOP3 10%                          |
| levoglucosan            | 0.001016     | SHOP8 15%                          |
| uncertainty             | 0.000998     | SHOP11 40%                         |
| ANTEISO-TRIACONTANE     | 9.66E-07     | SHOP14 24%                         |
| uncertainty             | 9.19E-07     | SHOP15 11%                         |
| ISO-HENTRIACONTANE      | 0            |                                    |
| uncertainty             | 9.19E-07     |                                    |
| ANTEISO-DOTRIACONTANE   | 1.34E-06     |                                    |
| uncertainty             | 5.56E-07     |                                    |
| ISO-TRITRIACONTANE      | 0            |                                    |
| uncertainty             | 9.19E-07     |                                    |
| 22,29,30-TRISNORHOPANE  | 3.33E-05     |                                    |
| uncertainty             | 6.77E-06     |                                    |
| 17B-21A-30-NORHOPANE    | 0.000161     |                                    |
| uncertainty             | 3.21E-05     |                                    |
| 17A-21B-HOPANE          | 0.000152     |                                    |
| uncertainty             | 3.04E-05     |                                    |
| 22S,AB-30-HOMOHOPANE    | 5.82E-05     |                                    |
| uncertainty             | 1.18E-05     |                                    |
| 22R,AB-30-HOMOHOPANE    | 5.74E-05     |                                    |
| uncertainty             | 1.15E-05     |                                    |
| 20R,ABB-CHOLESTANE      | 3.31E-05     |                                    |
| uncertainty             | 6.62E-06     |                                    |
| 20S,ABB-CHOLESTANE      | 2.24E-05     |                                    |
| uncertainty             | 4.34E-06     |                                    |
| 20R,ABB-SITOSTANE       | 3.49E-05     |                                    |
| uncertainty             | 7E-06        |                                    |
| 20S,ABB-SITOSTANE       | 2.31E-05     |                                    |
| uncertainty             | 4.67E-06     |                                    |
| HEXADECYLCYCLOHEXANE    | 0.000119     |                                    |
| uncertainty             | 2.39E-05     |                                    |
| HEPTADECYLCYCLOHEXANE   | 7.18E-05     |                                    |
| uncertainty             | 1.46E-05     |                                    |
| OCTADECYLCYCLOHEXANE    | 8.06E-05     |                                    |
| uncertainty             | 1.62E-05     |                                    |
| NONADECYLCYCLOHEXANE    | 5.6E-05      |                                    |
| uncertainty             | 1.15E-05     |                                    |
| BENZ(DE)ANTHRACEN-7-ONE | 0.000164     |                                    |
| uncertainty             | 3.3E-05      |                                    |
| BENZO(B)FLUORANTHENE    | 0.000268     |                                    |
| uncertainty             | 5.37E-05     |                                    |

Supplementary Material (ESI) for Journal of Environmental Monitoring  
This journal is © The Royal Society of Chemistry 2008

|                      |          |
|----------------------|----------|
| BENZO(E)PYRENE       | 0.000207 |
| uncertainty          | 4.16E-05 |
| INDENO(CD)PYRENE     | 0.000287 |
| uncertainty          | 5.74E-05 |
| DIBENZ(AH)ANTHRACENE | 2.88E-05 |
| uncertainty          | 5.91E-06 |
| BENZO(GHI)PERYLENE   | 0.000378 |
| uncertainty          | 7.56E-05 |

**Table S2.** Concentration of air toxics and relevant source tracers normalized by organic carbon (OC) concentration.

| Air Toxics<br>(ng µg OC <sup>-1</sup> ) | 5    | 7    | 8    | 11    | Mex  | 3    | 5     | 7    | 8    | 11   | 14   | 15   | Mex  | 3           | 8           | 11          | 14          | 15          |
|-----------------------------------------|------|------|------|-------|------|------|-------|------|------|------|------|------|------|-------------|-------------|-------------|-------------|-------------|
|                                         | yard | yard | yard | yard  | yard | dock | dock  | dock | dock | dock | dock | dock | dock | repair shop |
| Quinoline <sup>e</sup>                  | ND   | 0.05 | 0.03 | 10.15 | N/A  | 0.04 | ND    | 0.02 | 0.02 | 2.85 | 0.04 | 0.03 | N/A  | 0.03        | 0.01        | 0.02        | 0.01        | 0.04        |
| Isoquinoline <sup>e</sup>               | ND   | 0.08 | 0.08 | 3.54  | N/A  | 0.12 | ND    | 0.04 | 0.03 | 0.66 | 0.08 | 0.05 | N/A  | 0.06        | 0.02        | 0.02        | 0.02        | 0.05        |
| methyl quinoline <sup>e</sup>           | ND   | 0.06 | 0.10 | 7.38  | N/A  | 0.05 | ND    | 0.02 | 0.04 | 0.88 | 0.05 | 0.11 | N/A  | 0.04        | 0.04        | 0.07        | 0.05        | 0.09        |
| dimethyl quinoline <sup>e</sup>         | ND   | 0.04 | 0.05 | 1.60  | N/A  | 0.08 | 0.05  | 0.03 | 0.02 | 0.17 | 0.05 | 0.10 | N/A  | 0.09        | 0.09        | 0.05        | 0.20        | 0.12        |
| Dibenzofuran <sup>e</sup>               | 0.03 | 0.02 | ND   | 0.24  | N/A  | 0.07 | 0.04  | ND   | ND   | 0.07 | ND   | 0.03 | N/A  | 0.03        | ND          | 0.01        | 0.01        | 0.03        |
| Carbazole <sup>e</sup>                  | ND   | ND   | ND   | 4.98  | N/A  | ND   | ND    | ND   | ND   | 0.44 | ND   | ND   | N/A  | ND          | ND          | 0.03        | ND          | ND          |
| Dimethyl Phthalate <sup>c</sup>         | ND   | ND   | 0.02 | ND    | N/A  | 1.65 | ND    | ND   | 0.10 | 0.03 | 0.27 | 0.01 | N/A  | 0.71        | 0.05        | ND          | 0.42        | 0.23        |
| Dibutyl Phthalate <sup>c</sup>          | ND   | 0.05 | ND   | ND    | N/A  | 1.55 | 1.85  | 0.90 | 0.34 | 0.04 | 1.17 | 1.63 | N/A  | 0.68        | 0.99        | 0.38        | 0.71        | 0.99        |
| Bis(2-ethylhexyl)phthalate <sup>c</sup> | 8.21 | 1.53 | 0.51 | 0.28  | N/A  | 3.97 | 11.03 | 1.27 | 1.14 | 0.29 | 1.49 | 3.52 | N/A  | 1.55        | 1.07        | 1.31        | 1.08        | 3.33        |
| Fluoranthene <sup>c</sup>               | 0.01 | 0.04 | 0.03 | 17.43 | 0.18 | 0.08 | 0.02  | 0.02 | 0.02 | 2.79 | 0.04 | 0.03 | 0.01 | 0.09        | 0.06        | 0.24        | 0.07        | 0.03        |
| Acephenanthrylene <sup>c</sup>          | 0.02 | 0.01 | 0.01 | ND    | ND   | ND   | ND    | 0.01 | 0.01 | 0.04 | 0.01 | ND   | ND   | 0.05        | 0.03        | 0.03        | 0.02        | 0.02        |
| Pyrene <sup>c</sup>                     | 0.01 | 0.03 | 0.03 | 13.71 | 0.17 | 0.09 | 0.02  | 0.02 | 0.04 | 2.05 | 0.04 | 0.02 | 0.03 | 0.21        | 0.13        | 0.28        | 0.11        | 0.03        |
| cyclopenta(cd)pyrene <sup>c</sup>       | ND   | 0.21 | ND   | 9.40  | ND   | ND   | ND    | 0.14 | 0.19 | 0.44 | 0.23 | ND   | 0.03 | 1.39        | 0.95        | 1.03        | 1.06        | ND          |
| benzo(GHI)fluoranthene <sup>c</sup>     | ND   | 0.19 | 0.21 | 7.27  | ND   | 0.33 | ND    | ND   | 0.18 | 0.54 | 0.20 | ND   | 0.10 | 1.45        | 0.46        | 0.84        | 0.46        | ND          |
| Benz(a)anthracene <sup>c</sup>          | ND   | 0.03 | 0.02 | 5.45  | 0.10 | 0.04 | ND    | 0.02 | 0.02 | 0.14 | 0.04 | 0.02 | 0.02 | 0.25        | 0.07        | 0.27        | 0.09        | 0.02        |
| chrysene/triphenylene <sup>c</sup>      | ND   | 0.03 | 0.03 | 5.94  | 0.06 | 0.03 | ND    | 0.03 | 0.04 | 0.18 | 0.05 | 0.03 | 0.03 | 0.32        | 0.10        | 0.33        | 0.13        | 0.02        |
| Benzo (b)fluoranthene <sup>c</sup>      | 0.10 | 0.08 | 0.08 | 2.44  | 0.06 | ND   | 0.09  | 0.07 | 0.06 | 0.12 | 0.09 | 0.09 | 0.04 | 0.28        | 0.14        | 0.30        | 0.18        | 0.08        |
| benzo(k)fluoranthene <sup>c</sup>       | ND   | 0.00 | ND   | 1.91  | 0.10 | ND   | ND    | 0.00 | 0.00 | 0.03 | 0.00 | ND   | 0.00 | 0.23        | 0.10        | 0.26        | 0.12        | ND          |
| Benzo(j)fluoroanthene <sup>c</sup>      | ND   | 0.07 | ND   | 0.21  | ND   | ND   | ND    | ND   | ND   | 0.07 | ND   | ND   | ND   | 0.13        | 0.07        | 0.09        | 0.06        | ND          |
| benzo(e)pyrene <sup>c</sup>             | 0.05 | 0.07 | 0.05 | 1.79  | 0.07 | ND   | 0.05  | 0.05 | 0.04 | 0.08 | 0.06 | 0.04 | 0.03 | 0.32        | 0.18        | 0.31        | 0.22        | 0.05        |
| benzo(a)pyrene <sup>c</sup>             | ND   | 0.06 | 0.05 | 1.60  | ND   | ND   | ND    | 0.04 | 0.04 | 0.07 | 0.05 | 0.04 | ND   | 0.36        | 0.22        | 0.34        | 0.26        | 0.04        |
| Perylene <sup>e</sup>                   | ND   | ND   | ND   | 0.31  | ND   | ND   | ND    | ND   | ND   | 0.04 | ND   | ND   | ND   | 0.09        | 0.06        | 0.09        | 0.07        | 0.02        |

Supplementary Material (ESI) for Journal of Environmental Monitoring  
This journal is © The Royal Society of Chemistry 2008

|                                           |      |       |       |       |       |        |      |      |       |       |       |      |      |             |             |             |             |             |
|-------------------------------------------|------|-------|-------|-------|-------|--------|------|------|-------|-------|-------|------|------|-------------|-------------|-------------|-------------|-------------|
| indeno(cd)pyrene <sup>c</sup>             | ND   | 0.04  | 0.03  | 0.61  | ND    | ND     | ND   | 0.03 | 0.03  | 0.05  | 0.03  | ND   | ND   | 0.34        | 0.19        | 0.27        | 0.28        | 0.01        |
| dibenz(ah)anthracene <sup>c</sup>         | ND   | ND    | ND    | 0.20  | ND    | ND     | ND   | ND   | ND    | ND    | ND    | ND   | ND   | 0.05        | 0.02        | 0.03        | 0.02        | ND          |
| benzo(ghi)perylene <sup>c</sup>           | ND   | 0.08  | 0.05  | 0.42  | 0.42  | ND     | ND   | 0.07 | 0.04  | 0.06  | 0.04  | 0.04 | 0.06 | 0.47        | 0.30        | 0.33        | 0.36        | 0.05        |
| Coronene <sup>c</sup>                     | ND   | 0.06  | 0.03  | 0.06  | ND    | ND     | ND   | 0.04 | 0.03  | 0.03  | 0.03  | ND   | 0.07 | 0.32        | 0.18        | 0.13        | 0.29        | 0.05        |
|                                           | 5    | 7     | 8     | 11    | Mex   |        | 5    | 7    | 8     | 11    | 14    | 15   | Mex  | 3           | 8           | 11          | 14          | 15          |
|                                           | yard | yard  | yard  | yard  | yard  | 3 dock | dock | dock | dock  | dock  | dock  | dock | dock | repair shop |
| 9,10 Anthraquinone <sup>c</sup>           | ND   | 0.26  | ND    | 4.45  | ND    | ND     | ND   | 0.18 | ND    | 0.71  | 0.22  | 0.27 | 0.03 | ND          | ND          | 0.18        | 0.14        | 0.27        |
| 1h-phenalen-1-one <sup>c</sup>            | ND   | 0.24  | ND    | ND    | ND    | ND     | ND   | ND   | ND    | 0.29  | 0.24  | ND   | ND   | 0.00        | 0.22        | ND          | 0.17        | 0.00        |
| Benz(a)anthracene-7,12-dione <sup>c</sup> | ND   | ND    | ND    | 0.81  | ND    | ND     | 0.00 | ND   | ND    | ND    | 0.00  | ND   | ND   | 0.00        | ND          | ND          | ND          | 0.00        |
| benz(de)anthracene-7-one <sup>c</sup>     | ND   | ND    | ND    | 0.48  | ND    | ND     | 0.00 | ND   | ND    | 0.22  | ND    | ND   | ND   | 0.34        | 0.20        | 0.17        | ND          | 0.00        |
| 1,8-naphthalic anhydride <sup>c</sup>     | ND   | ND    | ND    | 2.15  | ND    | ND     | 0.00 | ND   | ND    | ND    | 0.00  | ND   | ND   | 0.00        | ND          | ND          | 0.00        | 0.00        |
| <b>Source Tracers</b>                     |      |       |       |       |       |        |      |      |       |       |       |      |      |             |             |             |             |             |
| methyl PAH <sup>c,e</sup>                 | ND   | ND    | ND    | 1.24  | 0.01  | ND     | ND   | ND   | ND    | 13.35 | ND    | ND   | 0.01 | ND          | 0.16        | ND          | ND          | ND          |
| Hopanes <sup>c,d</sup>                    | 0.26 | 0.74  | 0.76  | 0.56  | 0.74  | 0.22   | 0.07 | 0.14 | 0.17  | 0.12  | 0.48  | 0.16 | 0.10 | 0.07        | 0.46        | 0.55        | 0.42        | 0.23        |
| Steranes <sup>c,d</sup>                   | ND   | 0.31  | 0.31  | 0.22  | 0.43  | ND     | ND   | 0.07 | 0.10  | ND    | 0.20  | 0.08 | 0.04 | ND          | 0.18        | 0.18        | 0.15        | 0.12        |
| Cyclohexanes <sup>c,e</sup>               | 0.77 | 0.88  | 0.64  | 0.62  | 1.07  | 1.59   | ND   | 0.11 | 0.30  | ND    | 0.63  | 0.36 | 0.19 | 0.72        | 0.51        | 0.34        | 0.31        | 0.27        |
| Isoprenoids <sup>d</sup>                  | ND   | ND    | 0.30  | 1.76  | ND    | 1.70   | ND   | ND   | 0.84  | 1.24  | 0.70  | ND   | ND   | 1.37        | 0.83        | 0.32        | 0.46        | 0.79        |
| iso-alkanes <sup>d</sup>                  | 0.01 | ND    | ND    | ND    | 0.78  | 0.01   | ND   | ND   | ND    | ND    | 0.01  | 0.01 | 0.09 | 0.01        | 4.64        | 3.61        | 0.00        | 0.00        |
| Levoglucozan <sup>c</sup>                 | 5.34 | 9.72  | 14.92 | 17.79 | ND    | ND     | 3.59 | 7.17 | 10.81 | 15.38 | 13.71 | ND   | ND   | 6.47        | 10.86       | 8.07        | 0.52        | 1.49        |
| Cholesterol <sup>c</sup>                  | ND   | ND    | ND    | ND    | 0.52  | ND     | ND   | ND   | ND    | ND    | ND    | ND   | 0.16 | ND          | ND          | 3.07        | ND          | ND          |
| Alkanes <sup>c,e</sup>                    | 0.02 | 1.21  | 0.61  | ND    | 14.89 | 0.01   | 0.44 | 2.08 | 0.75  | 1.71  | 1.35  | 2.94 | 4.41 | 1.29        | 9.65        | 6.00        | 0.45        | 0.01        |
| aliphatic diacids <sup>c</sup>            | 0.00 | ND    | 2.28  | 2.43  | 0.59  | 0.76   | 0.60 | ND   | ND    | 0.56  | 2.91  | 0.48 | 0.35 | 0.00        | 0.66        | 2.42        | 0.00        | 0.10        |
| alkanoic acids <sup>c,e</sup>             | 3.38 | 2.53  | 1.17  | 1.59  | 8.65  | 19.98  | 1.39 | 2.01 | 2.25  | 0.88  | 2.69  | 3.25 | 2.81 | 1.30        | 2.70        | 1.96        | 0.37        | 2.96        |
| aromatic acids <sup>c</sup>               | 0.08 | 0.35  | 0.23  | 1.35  | 1.89  | 1.02   | 1.04 | 0.01 | ND    | 0.99  | 0.10  | 0.04 | 1.48 | 0.16        | 0.01        | 0.64        | 0.49        | 0.37        |
| Steroids <sup>e</sup>                     | ND   | 52.19 | 32.09 | 25.15 | 0.76  | 180.71 | ND   | ND   | 30.93 | ND    | 17.86 | ND   | ND   | 42.35       | 30.55       | 20.94       | 21.16       | ND          |

Supplementary Material (ESI) for Journal of Environmental Monitoring  
 This journal is © The Royal Society of Chemistry 2008

| <b>Bulk parameters</b><br><b>(<math>\mu\text{g m}^{-3}</math>)</b> |      |      |      |      |       |      |      |       |       |      |      |      |       |      |       |       |       |      |  |
|--------------------------------------------------------------------|------|------|------|------|-------|------|------|-------|-------|------|------|------|-------|------|-------|-------|-------|------|--|
| Organic carbon <sub>a</sub>                                        | 7.38 | 7.40 | 9.83 | 6.91 | 12.49 | 4.64 | 9.99 | 12.56 | 12.08 | 9.10 | 9.25 | 7.46 | 21.79 | 7.58 | 15.92 | 37.32 | 17.41 | 8.03 |  |
| Elemental carbon <sub>a</sub>                                      | 0.18 | 1.63 | 3.31 | 0.41 | 3.19  | 0.87 | 0.30 | 2.42  | 1.35  | 0.76 | 0.52 | 1.01 | 3.65  | 6.19 | 2.93  | 12.44 | 5.44  | 1.17 |  |
| EC/TC <sub>b</sub>                                                 | 0.02 | 0.18 | 0.25 | 0.06 | 0.20  | 0.16 | 0.03 | 0.16  | 0.10  | 0.08 | 0.05 | 0.12 | 0.14  | 0.45 | 0.16  | 0.25  | 0.24  | 0.13 |  |

<sup>a</sup> Carbon concentrations are in  $\mu\text{g m}^{-3}$ .

<sup>b</sup> Elemental carbon divided by total carbon. ND is given for any value which is below the uncertainty for compound.

<sup>c</sup> Identification based on quantitative standard.

<sup>d</sup> Identification based on qualitative standard.

<sup>e</sup> Identification based on mass spectra libraries (NIST 98 and WILEY138)

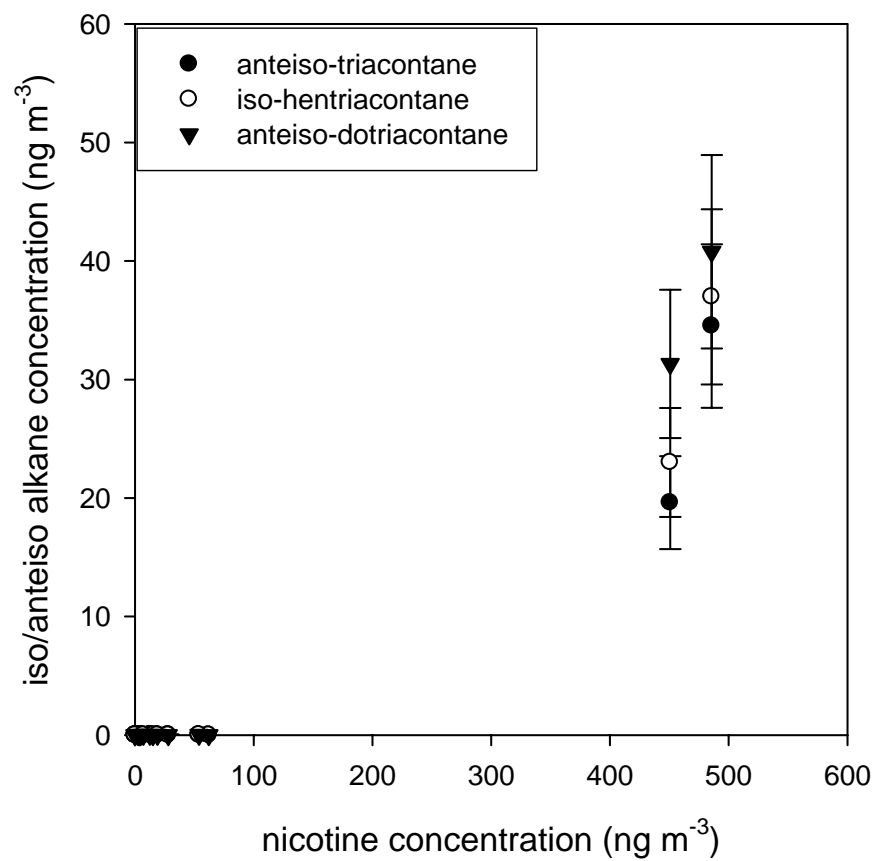

Figure S 1

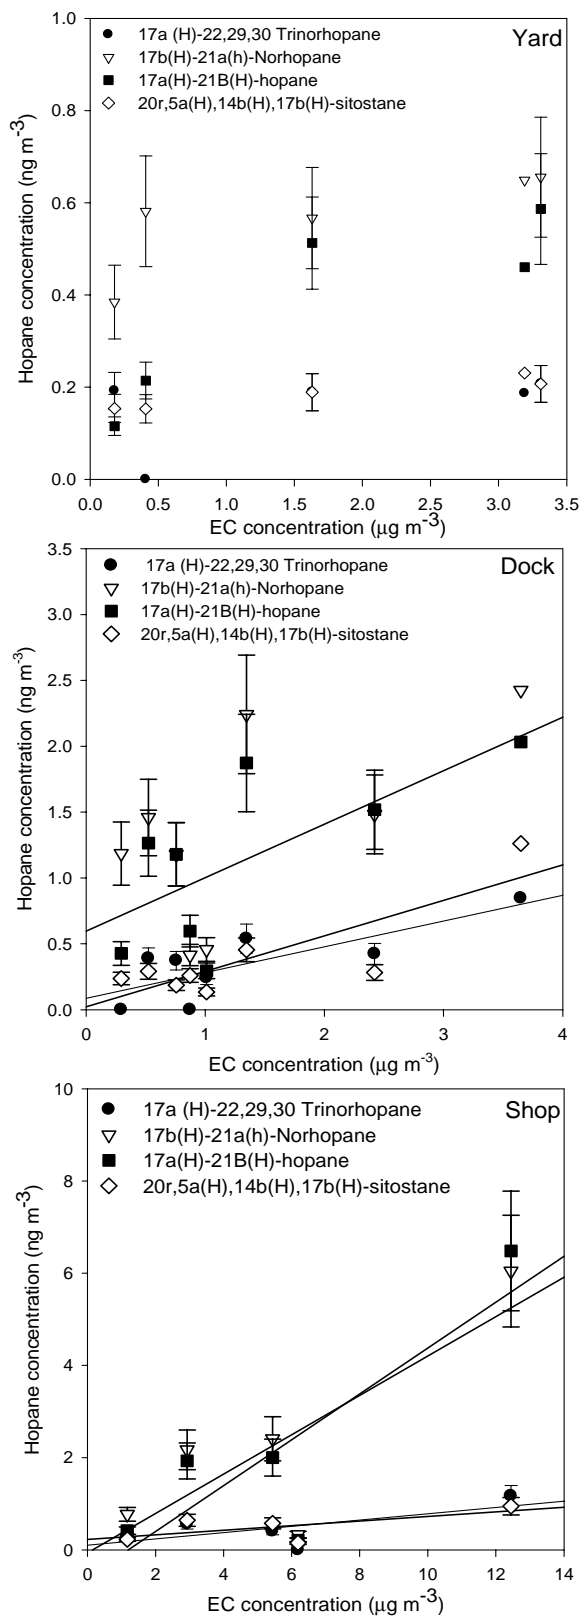

**Figure S 2** Correlation plots for key mobile source hopanes and steranes with EC (elemental carbon) including published relationships for gasoline, high load diesel and lubricating oil-impacted exhaust in the repair shop plot.
